# Supplementary material
Source: ML conference proceedings conference paper supplement (https://openaccess.thecvf.com/content/ICCV2021/html/Wood_Fake_It_Till_ICCV_2021_paper.html)
Supplement: Supplementary file 1 [file Wood_Fake_It_Till_ICCV_2021_supplemental.zip]

Archive with 2 entries (2 files):
- 06962.mp4
- 06962_supp.pdf
